# Supplementary material for: Targeting the protein backbone with aryl halides: systematic comparison of halogen bonding and π⋯π interactions using N-methylacetamide
Source: Royal Society of Chemistry journal article supplement (doi:10.1039/c5md00499c), 2016-01-01
Supplement: c5md00499c1.pdf [file c5md00499c1.pdf]

## Targeting the Protein Backbone with Aryl Halides: Systematic Comparison of Halogen Bonding and $\pi\cdots\pi$ Interactions using *N*-methylacetamide

M. O. Zimmermann<sup>a,b</sup> and F. M. Boeckler<sup>a,b</sup>

<sup>a</sup> Department of Pharmaceutical and Medicinal Chemistry, Institute of Pharmaceutical Sciences, Eberhard Karls Universität Tübingen, Auf der Morgenstelle 8, 72076 Tübingen, Germany.

<sup>b</sup> Center for Bioinformatics Tuebingen (ZBIT), Eberhard Karls University Tuebingen, Sand 1, 72076 Tuebingen, Germany.

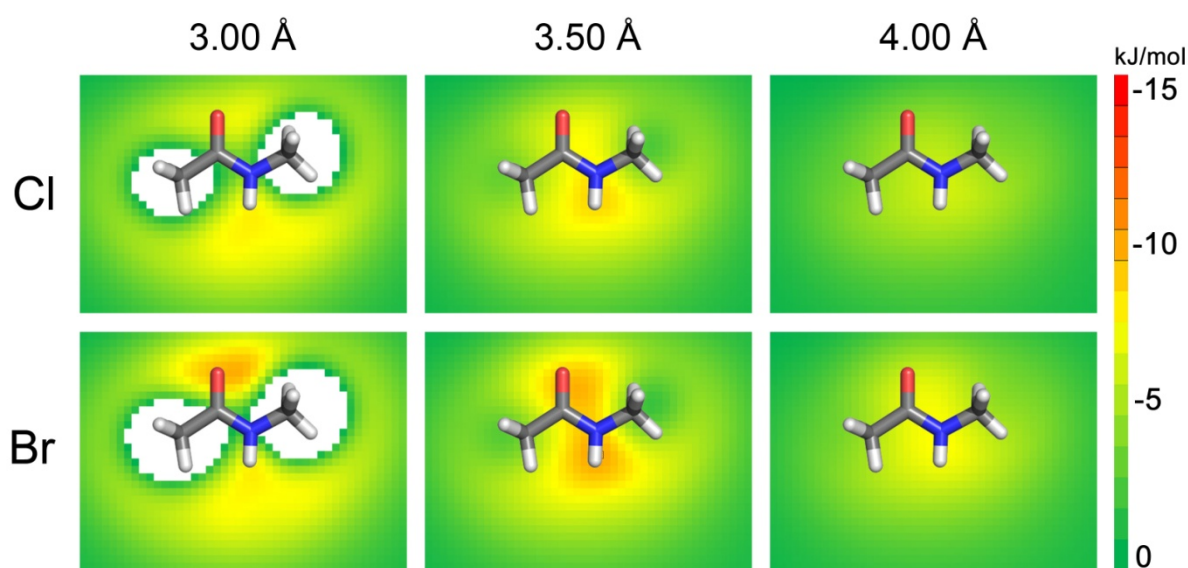

**Figure S1.** Planescans for chlorobenzene and bromobenzene with *N*-methylacetamide in distances of 3.0, 3.5, and 4.0 Å calculated using TPSS(D3)/TZVPP. Positive energy values (> 0 kJ/mol) are omitted. The setup of the scan is similar to that shown in Figure 2. The most favourable interaction energies for chlorobenzene and bromobenzene are -8.7 kJ/mol and -10.1 kJ/mol, respectively (at a distance of 3.5 Å).

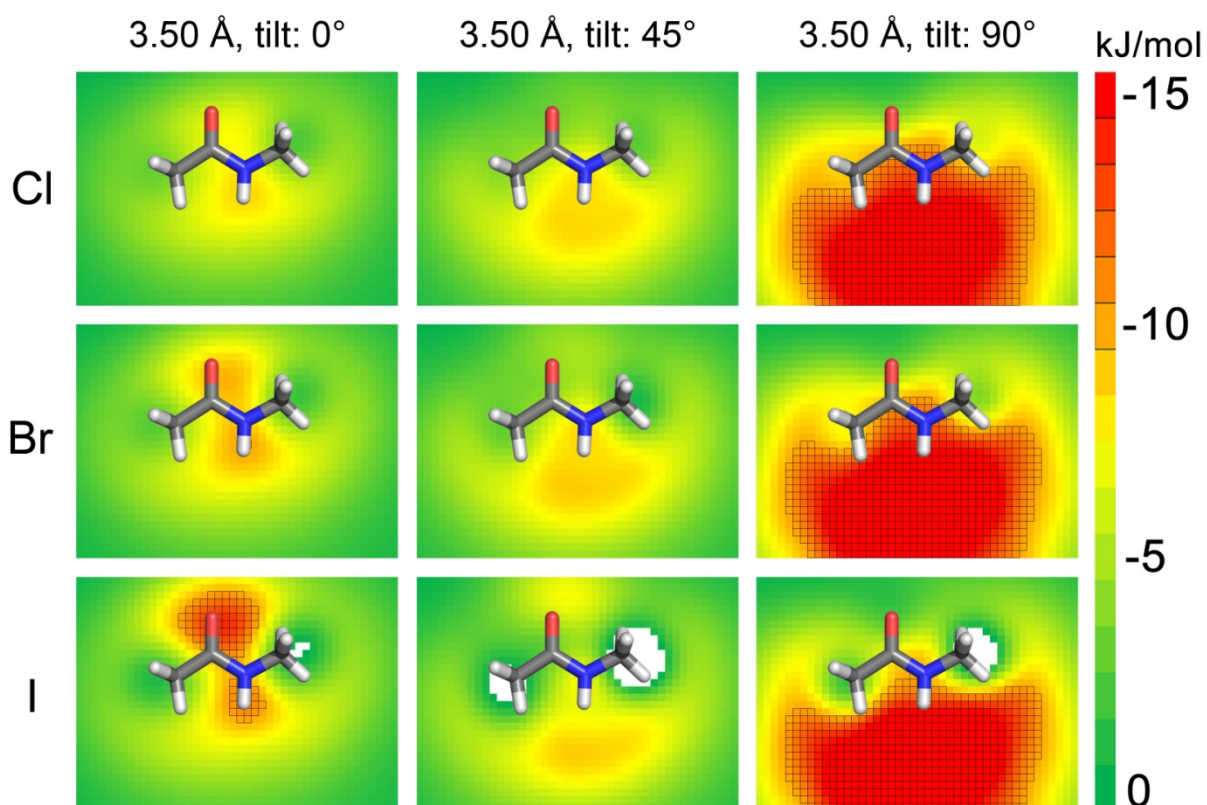

**Figure S2.** Tilted plane scans of chlorobenzene, bromobenzene, and iodobenzene with *N*-methylacetamide for tilt angles 0° (regular plane scan), 45°, and 90° in a distance of 3.5 Å. Positive energy values (> 0 kJ/mol) are omitted. Energy values < -10 kJ/mol are highlighted with a black border. Calculations were performed using TPSS(D3)/TZVPP.
